# Supplementary material for: Multi-scale temporal variability in meltwater contributions in atropical glacierized watershed
Source: Copernicus journal article supplement (doi:10.5194/hess-2018-260), 2018-05-31
Supplement: Supplementary file 1 [file HBCM Table.xlsx]

## Sheet: formatted
		Jan2012, orig cell configuration					Jan2012 2012, only MOCH-323 GW					Jan2012, coarsest cell config with only MOCH-323 GW
site code	cell type-site code	Glacier % Low	Glacier % High	RE_Min	RE_Max		Glacier % Low	Glacier % High	RE_Min	RE_Max		Glacier % Low	Glacier % High	RE_Min	RE_Max
0	melt	100	100				100	100				100	100
2	R, GW=5	100	100				100	100				100	100				R=Reach
4	C, T=3	87.3	95.1	0.0514878	0.0242953		87.3	95.1	0.0514878	0.0242953		87.3	95.1	0.0889238	0.0576396		C=Confluence
7	R, GW=5	79.8795	95.0049	0.0156391	0.0410061		79.8795	95.0049	0.0156395	0.0410061							T=Tributary
8	C, T=6	77.0038	95.0049	0.0583387			77.0038	95.0049	0.0583387
10	R, GW=5	68.2254	92.2498	0.0747098	0.0449237		68.2254	92.2498	0.0747049	0.0449232
11	C, T=9	60.9253	89.5745	0.013785	0.0031867		60.9253	89.5745	0.013785	0.0031868
14	R, GW=13	23.0298	45.2351	0.0071338	0.0726396		36.0068	59.7462	0.09	0.05		46.8801	57.1551	0.0943459	0.0326343
16	C, T=15	1.63511	5.38298	0.0191697	0.0099478		2.55649	7.1098	0.0158066	0.0099478		3.32849	6.80146	0.0158066	0.0099478
		July2012, orig cell configuration					July 2012, only MOCH-323 GW					July2012, coarsest cell config with only MOCH-323 GW
site code	cell type-site code	Glacier % Low	Glacier % High	RE_Min	RE_Max		Glacier % Low	Glacier % High	RE_Min	RE_Max		Glacier % Low	Glacier % High	RE_Min	RE_Max
0	melt	100	100				100	100				100	100
2	R, GW=5	98.8	98.8	0.013233	0.013233		98.8	98.8	0.013233	0.013233		98.8	98.8	0.013233	0.013233
4	C, T=3	98.0096	98.0096	0.0068344	0.0068344		98.0096	98.0096	0.0068344	0.0068344		98.0096	98.0096	0.0068344	0.0068344
7	R, GW=5	95.6574	96.4414	0.0206772	0.0023019		95.6574	96.4414	0.0206772	0.0023019
8	C, T=5	93.4573	94.6091	0.0011913	0.000454195		93.4573	94.6091	0.0011913	0.000454195
10	R, GW=5	91.1208	93.7576	0.0166292	0.0157831		91.1208	93.7576	0.0166292	0.0157831
11	C, T=9	88.205	91.2261	0.006393	0.0147357		88.205	91.2261	0.006393	0.0147357
14	R, GW=13	35.282	65.5004	0.0848343	0.11579		43.2204	62.0338	0.0912615	0.151903		45.6725	57.5316	0.0843763	0.154878
16	C, T=15	2.71671	8.71155	0.0057844	0.0091197		3.32797	8.25049	0.0094813	0.0112567		3.51678	7.65171	0.0057844	0.0091197
		June2015, orig cell configuration					June2015, only MOCH-323 GW					June2015, coarsest cell config with only MOCH-323 GW
site code	cell type-site code	Glacier % Low	Glacier % High	RE_Min	RE_Max		Glacier % Low	Glacier % High	RE_Min	RE_Max		Glacier % Low	Glacier % High	RE_Min	RE_Max
0	melt	100	100				100	100				100	100
2	R, GW=5	100	100				100	100				100	100
4	C, T=3	92	92	0.018398	0.018398		92	92	0.018398	0.018398		92	92	0.018398	0.018398
7	R, GW=5
12	R, GW=5	46.92	59.616	0.0552129	0.0296529		46.92	59.616	0.0552129	0.0296529
14	R, GW=13	45.4655	57.7679	0.0059295	0.0059295		44.5271	56.5756	0.0064543	0.0064543		47.932	62.56	0.0790671	0.0611151
16	C, T=15	3.91003	9.1851	0.0027975	0.0161137		3.82933	8.99552	0.0027975	0.0161137		4.31388	9.82192	0.000856615	0.0161137
		June2016, orig cell configuration					June2016, only MOCH-323 GW					June2016, coarsest cell config with only MOCH-323 GW
site code	cell type-site code	Glacier % Low	Glacier % High	RE_Min	RE_Max		Glacier % Low	Glacier % High	RE_Min	RE_Max		Glacier % Low	Glacier % High	RE_Min	RE_Max
0	melt	100	100				100	100				100	100
2	R, GW=5	89.6	92.9	0.0279263	0.0339288		89.6	92.9	0.0279263	0.0339295		89.6	92.9	0.0279263	0.0339288
4	C, T=3	70.4256	86.7686	0.0138842	0.0072452		70.4256	86.7686	0.0138838	0.0123188		70.4256	86.7686	0.0138842	0.0072452
7	R, GW=5	68.7354	86.5083	0.0267966	0.0117062		68.7354	86.5083	0.0325823	0.0139983
12	R, GW=5	53.6823	74.1376	0.020724	0.0277227		53.6823	74.1376	0.020724	0.0277227
14	R, GW=13	45.1468	64.0549	0.0215585	0.0212788		42.0333	59.2359	0.027659	0.0335944		42.0441	68.3737	0.0857586	0.0350303
16	C, T=15	5.95938	16.9	0.0076384	0.0084917		5.54839	10.0109	0.0076351	0.0084917		5.54982	11.5551	0.004875	0.0065297
		February2017, orig cell configuration					February2017, only MOCH-323 GW					February2017, coarsest cell config with only MOCH-323 GW
site code	cell type-site code	Glacier % Low	Glacier % High	RE_Min	RE_Max		Glacier % Low	Glacier % High	RE_Min	RE_Max		Glacier % Low	Glacier % High	RE_Min	RE_Max
0	melt	100	100				100	100				100	100
2	R, GW=5	95.7	95.7	0.103586	0.103586		95.7	95.7	0.103586	0.103586		95.7	95.7	0.103586	0.103586
4	C, T=3	92.3505	92.3505	0.0681442	0.0681442		92.3505	92.3505	0.0681442	0.0681442		92.3505	92.3505	0.0681442	0.0681442
7	R, GW=5	92.3505	92.3505	0.25	0.25		92.3505	92.3505	0.25	0.25
8	C, T=6	82.2843	87.733	0.0293766	0.0434869		82.2843	87.733	0.0293766	0.0434869
10	R, GW=5	77.3472	83.5218	0.0135131	0.0144917		78.4169	83.6095	0.0144917	0.0144917
11	C, T=9	67.2147	80.1809	0.0840793	0.0261441		68.1443	80.2651	0.0807965	0.0095392
12		61.2999	73.9268	0.0464753	0.0956879		62.1476	74.0847	0.053695	0.0122723
14	R, GW=9	52.7792	63.651	0.0405444	0.0405444		51.3961	61.2681	0.0609605	0.0609605		60.859	72.9569	0.134994	0.115166
16	C, T=15	13.7754	16.6129	0.0349415	0.0349415		13.4144	15.991	0.0349415	0.0349415		15.8842	19.0417	0.0349415	0.0349415
