# Supplementary material for: Multi-scale temporal variability in meltwater contributions in atropical glacierized watershed
Source: Copernicus journal article supplement (doi:10.5194/hess-2018-260), 2018-05-31
Supplement: Supplementary file 2 [file hess-2018-260-supplement.zip]

Archive with 2 entries (2 files):
- Supplement.pdf
- HBCM Table.xlsx
